# Supplementary material for: New role for an old acquaintance: miR-1246 as a new inflammatory and prognostic marker in polytrauma patients
Source: PeerJ. 2025 Apr 7;13:e19185. doi: 10.7717/peerj.19185 (PMC11984479; doi:10.7717/peerj.19185)
Supplement: Supplemental Information 1 [file peerj-13-19185-s001.xlsx]

## Sheet: Tabelle2
	Sepsis	sex	miR1246 T1 SR	miR1246 T2 48h	Troponin pg/ml auf Intensiv erster Wert Graubereich 14-50 pg/ml	ISS	CK U/l	CKMB U/L	Myoglobine ng/ml	Leucocytes	creatinine	Glukose	CRP	TAGs in mg/dl	HB (Rountine)	Lactate mg/dl	K+ in mmol/l	Survival	Smoking	penetrating Trauma	Time on ICU/IMC	ventilations time	catecholamines	time in hospital	IL-6 (ER)	IL-6 24h	IL-6 48h Trauma		IL-10 (ER)	IL-10 24h	IL-10 48h
TBI	nein	f	1.10229	0.78931	n.a.	25	76	19	24	7.74	0.68	163	0.12	136	13.6	21	3.22	no	n.a.	no	43	43	no	43	23.014		59.106		6.5542		7.6693
TBI	nein	m	0.5962	1.36149	n.a.	29	1728	164	n.a.	11.39	0.96	163	1.29	n.a.	12.5	43	4.55	yes	n.a.	no	5	5	yes	5
TBI	nein	m	0.636667	1.20917	n.a.	35	97	34	102	7.15	1.25	136	0.1	73	11.8	10	4.15	no	n.a	no		5	no	15
TBI	nein	f	0.706165		n.a.	25	1370	42	419	14.24	0.58	n.a.	0.31	119	10.6	n.a.	n.a.	no	n.a.	no	6	4	no	21	28.151	69.766	67.516		53.454	12.501	2.8104
TBI	nein	m	0.627445	0.646232	n.a.		359	53	62	18.85	1.23	n.a.	0.15	73	14.7	41	3.36	no	n.a.	no	3	11	yes	24	0	62.871	21.487		0	0	0.76114
TBI	nein	f	0.79713	0.688723	n.a.	25	187	38	244	3.98	0.51	131	0.05	135	11.5	29	3.42	no	n.a.	no	12	12	no	19	19.772	49.492	215.4		3.4863	9.4993	0
TBI			0.391695			33																			429.52				187.45
PT			24.8394			34																			87.969	76.292	141.52		65.2	5.1571	5.4052
PT	nein	m	0.827576	0.23297	n.a.	34	273	181	1126	12.5	1.09	134	0.47	115	11.6	37	3.94	no	n.a.	no	15		no	42	89.715	116.42	101.03		57.43	1.0632	0
PT	nein	m	1.65387	0.383975	n.a.	34	772	61	2529	16.19	0.84	120	0.02	n.a.	8	53	3.61	no	n.a.	yes	44	3	yes	78	253.61	782.01	616.64		458.22	7.8275	6.7775
PT	nein	m	1.4468		8	29	1798	35	563	7.27	0.98	n.a.	n.a.	n.a.	10.1	6	3.7	no	n.a.	no	8	0	no	17	16.606	54.909	115.03		0	0	3.033
PT	nein	m	2.02366		n.a.	75	720	257	3926	13.27	1.19	217	0.05	n.a.	8.3	68	4.98	no	n.a.	no	41	7	yes	84	300.81	2948.4	3523.9		89.031	240.13	46.455
PT	nein	m		1.61724	287	38	995	69	2131	16.44	1.37	n.a.	n.a.	n.a.	10.3	n.a.	n.a.	no	n.a.	no			no	27	276.51	201.48	62.346		546.54	19.87	1.1606
PT	nein	m		0.288415	8	22	894	26	n.a.	7.96	0.92	n.a.	n.a.	n.a.	12.7	n.a.	n.a.	no	n.a.	yes	8	5	yes	13	240.71	911.1	200.03		108.47	17.186	6.1845
PT	nein	m		0.75694	8	26	4988	77	2878	16.48	1.08	n.a.	n.a.	n.a.	12.3	21	5.3	no	n.a.	no	12	0	no	18	59.505	99.961	76.252		33.751	4.1797	5.8666
