# Supplementary material for: New role for an old acquaintance: miR-1246 as a new inflammatory and prognostic marker in polytrauma patients
Source: PeerJ. 2025 Apr 7;13:e19185. doi: 10.7717/peerj.19185 (PMC11984479; doi:10.7717/peerj.19185)
Supplement: Supplemental Information 2 [file peerj-13-19185-s002.xlsx]

## Sheet: Tabelle1
	Probe	Cq1	Cq2	Cqmean	mir39	unisp2	mean(39+sp2)	2^-dCt
healthy	1	39.6234	39.6786	39.651	26.3938	21.0338	23.7138	1.59374e-05
healthy	2	37.9855		37.9855	26.2291	20.764	23.4966	4.34897e-05						healthy	1.59374e-05	4.34897e-05	8.64049e-05	0.000133511
healthy	3	37.813	36.7751	37.2941	25.6194	21.9716	23.7955	8.64049e-05						ISS<20 T1	0.000703671	0.00054413	0.00595041	0.000347185	0.000237524
healthy	4	35.9904	37.3626	36.6765	25.576	22.0355	23.8058	0.000133511						ISS>20 T1	0.00358247	0.00610231	0.00634177	0.000963717	0.0059909
ISS<20 T1	5	35.9904	37.3626	36.6765	25.576	26.8314	26.2037	0.000703671						ISS<20 T2	0.000171651	0.000106242	0.000100538	8.1236e-05	3.78336e-05
ISS<20 T1	6	34.0473	34.2977	34.1725	26.0327	20.6248	23.3287	0.00054413						ISS>20 T2	0.000290485	0.000489765	0.000542581	9.95711e-05	0.00241536
ISS<20 T1	7	39.0308	38.6403	38.8355	29.0477	33.8378	31.4427	0.00595041
ISS<20 T1	8	35.8301	34.7814	35.3057	26.7403	20.8871	23.8137	0.000347185
ISS<20 T1	9	35.6115	35.6672	35.6394	25.9041	21.2953	23.5997	0.000237524
ISS>20 T1	10	32.4034	31.9524	32.1779	26.0042	22.102	24.0531	0.00358247
ISS>20 T1	11	32.0786	31.2031	31.6408	25.7164	22.8525	24.2844	0.00610231
ISS>20 T1	12	33.7044	33.6012	33.6528	30.5549	22.1488	26.3519	0.00634177
ISS>20 T1	13	32.7749	32.6632	32.7191	25.5495	19.8504	22.7	0.000963717
ISS>20 T1	14	31.8318	31.4614	31.6466	26.191	22.3363	24.2636	0.0059909
ISS<20 T2	15	37.0742	38.7695	37.9218	25.2483	25.5789	25.4136	0.000171651
ISS<20 T2	16	36.9629	35.9739	36.4684	25.5621	20.9739	23.268	0.000106242
ISS<20 T2	17	37.2478	37.6972	37.4725	26.2628	22.1223	24.1925	0.000100538
ISS<20 T2	18	36.57	35.671	36.1205	24.6762	20.3898	22.533	8.1236e-05
ISS<20 T2	19	37.9143	37.2077	37.561	25.367	20.3751	22.8711	3.78336e-05
ISS>20 T2	20	34.7544	34.4334	34.5939	25.3626	20.3267	22.8447	0.000290485
ISS>20 T2	21	34.277	34.1432	34.2101	26.1408	20.2882	23.2145	0.000489765
ISS>20 T2	22	34.5173	34.4363	34.4768	26.4567	20.8012	23.6289	0.000542581
ISS>20 T2	23	36.3424	36.7419	36.5421	25.4262	21.0703	23.2482	9.95711e-05
ISS>20 T2	24	31.7322	31.8758	31.804	25.251	20.9699	23.1105	0.00241536
