# Supplementary material for: New role for an old acquaintance: miR-1246 as a new inflammatory and prognostic marker in polytrauma patients
Source: PeerJ. 2025 Apr 7;13:e19185. doi: 10.7717/peerj.19185 (PMC11984479; doi:10.7717/peerj.19185)
Supplement: Supplemental Information 3 [file peerj-13-19185-s003.xlsx]

## Sheet: Tabelle1
	Sepsis	Geschlecht	Plasma mir1246	Plasma mir1246 T2 (48h)	EV miR1246 T1 ER	EV miR1246 T2 48h	Troponin pg/ml	ISS	CK U/l	CKMB U/L	Myoglobin ng/ml	Leucocytes	Creatinine	Glukose	CRP	TAGs in mg/dl	HB	Lactate mg/dl	K+ in mmol/l	Non-Survival	Smoking	penetrating Trauma	Time on ICU/IMC	Ventilation time	catecholamines	Time in hospital	IL-6 (ER)	IL-6 24h	IL-6 48h Trauma		IL-10 (ER)	IL-10 24h	IL-10 48h
tbi	no	m	0.0259218	0.0270484	0.06373	0.06485	n.a.	25	117	27	41	10.34	0.74	162	0.07	288	14.7	24	3.84	no	n.a.	no	24	5	no	39	23.014		59.106		6.5542		7.6693
tbi	no	m	0.0395782	6.49424e-05	0.03435	0.23212	n.a.	29	1728	164	n.a.	11.39	0.96	163	1.29	n.a.	12.5	43	4.55	yes	n.a.	no	5	5	yes	5
tbi	no	m	0.0286388	8.79139e-05	0.07385	0.18302	n.a.	35	97	34	102	7.15	1.25	136	0.1	73	11.8	10	4.15	no	n.a	no		5	no	15
tbi	no	f	0.0526913	0.0162785	0.02597	0.00011	n.a.	25	1370	42	419	14.24	0.58	n.a.	0.31	119	10.6	n.a.	n.a.	no	n.a.	no	6	4	no	21	28.151	69.766	67.516		53.454	12.501	2.8104
tbi	no	m	0.0310153	0.00708402	0.03507	1.07161	n.a.	29	359	53	62	18.85	1.23	n.a.	0.15	73	14.7	41	3.36	no	n.a.	no	3	11	yes	24	0	62.871	21.487		0	0	0.76114
tbi	no	f	6.09262e-05	6.68361e-05	0.03488	0.60267	n.a.	25	187	38	244	3.98	0.51	131	0.05	135	11.5	29	3.42	no	n.a.	no	12	12	no	19	19.772	49.492	215.4		3.4863	9.4993	0
tbi	no		0.547201		0.05721			33																			429.52				187.45
tbi	no	f	0.0069138	0.00192748	4.56492	0.23893	n.a.	25	76	19	24	7.74	0.68	163	0.12	136	13.6	21	3.22	no	n.a.	no	43	43	no	43	11.564	33.318	40.027		13.937	5.872	8.0925
tbi	no	m	0.0721931	0.0172733	0.14342	0.22208	n.a.	25	145	41	82	7.4	0.82	124	0.07	71	14.5	19	3.34	no	n.a.	no	13	0	no	22	0	17.365	17.142		0	2.9212	0
tbi	no	m	0.0224122		0.16686		n.a.	34	206	28	606	2.91	0.53	163	0.69	97	11.8	12	3.44	yes	n.a.	no	1	1	yes	1	14.626	73.724	38.117		51.058	14.092	76.241
pt			7.96581e-05		0.58344			34																			87.969	76.292	141.52		65.2	5.1571	5.4052
pt	no	m	4.49174e-05	6.83023e-05	0.81738	0.03038	n.a.	34	273	181	1126	12.5	1.09	134	0.47	115	11.6	37	3.94	no	n.a.	no	15		no	42	89.715	116.42	101.03		57.43	1.0632	0
pt	no	m	1.19609	0.0247701	0.63625	0.0466	n.a.	34	772	61	2529	16.19	0.84	120	0.02	n.a.	8	53	3.61	no	n.a.	yes	44	3	yes	78	253.61	782.01	616.64		458.22	7.8275	6.7775
pt	no	m	0.0372601	0.0304919	1.04233	0.02385	8	29	1798	35	563	7.27	0.98	n.a.	n.a.	n.a.	10.1	6	3.7	no	n.a.	no	8	0	no	17	16.606	54.909	115.03		0	0	3.033
pt	no	m	2.3858	0.571008	0.25545	0.21767	n.a.	75	720	257	3926	13.27	1.19	217	0.05	n.a.	8.3	68	4.98	no	n.a.	no	41	7	yes	84	300.81	2948.4	3523.9		89.031	240.13	46.455
pt	no	m	1.71202	4.60936e-05	0.13529	0.02859	287	38	995	69	2131	16.44	1.37	n.a.	n.a.	n.a.	10.3	n.a.	n.a.	no	n.a.	no			no	27	276.51	201.48	62.346		546.54	19.87	1.1606
pt	no	m		0.036455		0.00011	8	22	894	26	n.a.	7.96	0.92	n.a.	n.a.	n.a.	12.7	n.a.	n.a.	no	n.a.	yes	8	5	yes	13	240.71	911.1	200.03		108.47	17.186	6.1845
pt	no	m	2.24608	0.018702	0.60143	0.02223	8	26	4988	77	2878	16.48	1.08	n.a.	n.a.	n.a.	12.3	21	5.3	no	n.a.	no	12	0	no	18	59.505	99.961	76.252		33.751	4.1797	5.8666
pt	no	m	2.09861	0.0187402	1.53029	0.09442	n.a.	34	1337	150	3274	13.21	1.22	199	0.02	109	8.4	26	4.04	no	n.a.	no	7	5	yes	31	437.3	286.03	428.97		211.33	14.76	9.9674
pt	no	m	00:00:42.433000	0.000104974	0.03511	0.03678	n.a.	29	610	93	2819	9.34	1.29	134	0.11	n.a.	13.4	25	3.75	no	n.a.	no	7	1	yes	31	114	148.79	73.494		67.11	2.2474	3.3302
pt	no	m	0.221491	0.00963662	0.24603	6e-05	10	33	271	68	584	11.55	0.91	172	0.17	83	15.5	18	3.54	no	n.a.	no	19	6	yes	31	140.95	131.31			93.977	6.7828
