# Supplementary material for: New role for an old acquaintance: miR-1246 as a new inflammatory and prognostic marker in polytrauma patients
Source: PeerJ. 2025 Apr 7;13:e19185. doi: 10.7717/peerj.19185 (PMC11984479; doi:10.7717/peerj.19185)
Supplement: Supplemental Information 4 [file peerj-13-19185-s004.xlsx]

## Sheet: Tabelle1
Sepsis	sex	miR1246 T1	miR1246 T2	troponinin pg/ml	ISS	CK U/l	CKMB U/L	Myoglobin in ng/ml	Leucocytes	creatinine	Glukose	CRP	TAGs in mg/dl	HB	Lactate mg/dl	K+ in mmol/l	Non-Survival	smoking	penetrating Trauma	time on ICU/IMC	ventilation time	catecholamine	time in hospital	IL-6 (ER)	IL-6 24h Trauma		IL-10 (ER)	IL-10 24h
no	m	0.545431	0.105532	4	17	158	32	127	8	1.05	130	0.07	n.a.	14.1	20	3.2	no	n.a.	no	3	0	no	8	42.273	16.508		17.162	0.69555
no	m	0.0185789	0.0425313	6	17	207	65	74	13.14	1.29	229	0.48	56	9.45	18	4	no	n.a	no	24	0	no	12	15.638	73.524		329.98	5.3731
no	m	4.11589	0.0857086	149	17	231	24	206	16.19	0.89	135	0.07	49	12	13	4.6	no	yes	no	15	9	yes	31	45.031	52.154		0	0.83705
no	m	0.28354	0.0266195	n.a.	17	123	35	86	9.82	0.99	106	0.1	85	12.1	9	4.4	no	n.a	no	18	n.a.	no	18	25.563	46.704		3.877	0
no	m	0.297408	0.0311909	n.a.	17	220	96	251	8.99	0.94	87	1.76	88	11.8	9	3.6	no	n.a.	no	0	0	no	11	49.846	104.85		56.289	19.928
no	m	0.141709	0.0121666	235	17	425	84	98	17.36	1.07	218	0.28	147	12.1	36	4.3	no	n.a.	no	7	4	no	5	130.68	60.67		159.97	13.622
no	m	0.199033	0.0269985	n.a.	17	583	65	1549	11.94	0.97	93	0.12	206	14.5	20	4.7	no	n.a.	no	3	0	yes	16	42.897	48.801		19.786	2.4968
no	f	0.160085	0.0180077	n.a.	17	100	58	59	7.3	0.5	53	0.04	64	10	18	3.8	no	n.a.	no	3	0	n.a.	8	22.781	10.398		24.628	0.9862
no	m	0.722439	1.52789	n.a.	18	154	85	63	9.31	0.91	141	0.19	323	14.9	28	3.2	no	n.a.	no	4	0	no	11	28.021	49.837		62.995	0
no	m	1.45783	0.052206	n.a.	18	338	52	894	10.54	0.9	95	0.03	46	14.3	21	3.6	no	n.a.	no	2	0	no	15	64.622	55.801		60.291	3.4995
no	m	1.13059	0.0161741	3.1	18	166	40	276	14.51	0.04	98	0.04	n.a.	13.6	11	3.8	no	n.a.	no	9	9	no	23	71.626	157.12		49.99	12.016
no	f	0.660057	0.0719928	5.2	18	140	58	295	11.56	0.77	133	0.01	42	12.8	17	3.4	no	n.a.	no	7	0	yes	9	145.16	15.958		27.554	0.81743
no	m	4.29885	0.257138	14.5	41	251	69	400	14.05	0.92	132	0.28	55	12.7	18	3.6	no	n.a	no	7	2	no	27	101.64	28.958		138.98	1.312
no	f	11.9143	0.367603	87	41	192	128	540	14.71	0.59	149	0.03	128	9.7	12	3.3	no	n.a.	no	14	14	yes	13	98.879	283.19		178.15	15.877
no	m	5.20353	0.407257	24.8	45	733	171	5283	13.03	0.95	110	0.37	162	12.2	27	4.5	no	n.a.	no	11	0	n.a.	19	119.95	111.86		64.453	10.635
no	m	1.11743	0.270463	41.4	50	279	97	853	9.5	0.78	86	0.2	66	9.9	26	4.2	no	n.a.	no	18	18	yes	18	226.5	417.66		97.082	11.487
no	f	5.8615	0.71955	38.7	50	525	278	2247	30.3	1.16	155	0.6	120	14.7	62	4.9	no	n.a.	no	n.a.	n.a.	n.a.	82	137.46	175.81		337.41	8.2055
no	m	15.5301	0.318626	50.6	59	1537	341	2259	7.23	1.07	154	1.5	95	12.6	n.a.	2.61	no	n.a.	no	15	0	no	15	257.59	279.37		73.742	4.1743
no	m	0.408579	26.7127	5.63	30	336	75	633	22.5	1.06	153	0.07	164	14.3	17	3.9	no	n.a.	no	12	12	no	29	186.92	66.946		33.248	4.3031
no	m	10.3522	1.00047	1210	30	750	267	2437	21.43	2.08	185	0.46	180	15.3	35	3.4	no	n.a.	no	10	10	no	12	238.76	331.96		18.1	21.763
no	m	97.3566	0.392354	n.a.	33	242	71	510	15.06	1.37	144	0.23	156	15.1	34	4.1	no	n.a.	no	8	0	no	16	733.27	38.094		97.189	0.85457
no	f	0.746471	0.351076	n.a.	38	180	67	314	9.67	0.73	122	0.29	121	15.3	11	3.8	no	n.a.	no	12	12	yes	12	53.896	138.64		18.536	6.8741
SIRS	f	0.809951	0.0623288	n.a.	45	798	122	511	15.29	0.86	127	0.46	80	13.6	12	3.2	no	n.a.	no	10	10	no	10	81.887	64.111		128.95	13.951
nein	m			3.69	17	140	34	197	17.4	0.94	97	0.05	53	14.6	14	4.3	nein	n.a	nein	2	0	nein	9d	77747	94678
nein	w			15.4	16	54	57	124	16.26	1.12	170	0.08	198	14.5	24	3.9	nein	n.a.	nein	8	0	nein	13d	103.44	61929
nein	m			63.1	17	1451	62	2010	16.24	0.72	n.a.	n.a.	n.a.	13.5	19	3.5	nein	n.a.	nein	3	0	nein	6d	80968	250.88
nein	m			4	42	369	58	901	36.2	1.33	135	0.09	71	12.7	10	3.7	nein	n.a	nein	20	4	ja	20d	239.38	289.77
nein	m			14.8	43	293	121	963	13.99	1.18	283	0.25	183	13.4	41	4.33	nein	n.a.	nein	24	24	nein	24d	456.7	470.86
nein	m			21.5	47	520	158	1886	16.74	1.37	143	0.21	140	10.9	56	3.4	nein	n.a	nein	21	13	nein	21d	461.37	108.11
nein	m			6	50	225	105	120	12.12	0.69	150	0.32	170	12.3	9	3.5	nein	n.a	nein	18	18	n.a.	18d	46656	13506
nein	m			227	50	627	227	2245	33.76	1.69	303	0.04	93	9.9	33	3.6	nein	n.a.	nein	26	26	ja	23d	1645.7	656.79
nein	m			188	57	8209	386	17325	10.52	1.47	381	0.02	96	9.8	64	3.6	nein	n.a.	nein	17	17	ja	17d	1406.8	990.12
nein	w			725	57	1585	187	n.a.	11.26	0.85	n.a.	0.09	n.a.	9.2	103	3.1	nein	ja	nein	41	8	ja	96d	1173	555.59
nein	w			199	59	403	159	2762	15.66	0.64	231	0.02	106	9	48	4.2	ja	n.a.	nein	5	5	ja	5d	1709.8	752.06
nein	m			85.2	69	339	136	3672	9.76	0.99	314	0.01	109	7.5	58	4.7	nein	n.a.	nein	25	25	ja	42d	284.79	163.26
